# Supplementary material for: A genome-wide association study identifies a genomic region for the polycerate phenotype in sheep (Ovis aries)
Source: PubMed Central journal article supplement (PMC4756668; doi:10.1038/srep21111), 2016-02-17
Supplement: srep21111-s1.pdf [file srep21111-s1.pdf]

## Supplementary Materials

### **A genome-wide association study identifies a genomic region for the polycerate phenotype in sheep (*Ovis aries*)**

Xue Ren<sup>1,2\*</sup>, Guang-Li Yang<sup>1,3\*</sup>, Wei-Feng Peng<sup>1,2</sup>, Yong-Xin Zhao<sup>1,2</sup>, Min Zhang<sup>1</sup>, Ze-Hui Chen<sup>1,2</sup>, Fu-An Wu<sup>4</sup>, Juha Kantanen<sup>5,6</sup>, Min Shen<sup>7,8</sup> & Meng-Hua Li<sup>1</sup>

<sup>1</sup>CAS Key Laboratory of Animal Ecology and Conservation Biology, Institute of Zoology, Chinese Academy of Sciences (CAS), Beijing 100101, China

<sup>2</sup>University of Chinese Academy of Sciences (UCAS), Beijing 100049, China

<sup>3</sup>Department of Life Sciences, Shangqiu Normal University, Shangqiu 476000, China

<sup>4</sup>Bureau of Animal Husbandry and Veterinary Medicine, Sishui County, Jining 273200, China

<sup>5</sup>Green Technology, Natural Resources Institute Finland (Luke), Jokioinen 31600, Finland

<sup>6</sup>Department of Biology, University of Eastern Finland, Kuopio 70211, Finland

<sup>7</sup>Institute of Animal Husbandry and Veterinary Medicine, Xinjiang Academy of Agricultural and Reclamation Sciences, Shihezi 832000, China

<sup>8</sup>Key Laboratory of Sheep Breeding and Development Technology of Xinjiang

Production and Construction Crops (XPCC), Shihezi 832000, China

\*Equal contribution

Correspondence and requests for materials should be addressed to M.-H. L.

([menghua.li@ioz.ac.cn](mailto:menghua.li@ioz.ac.cn))

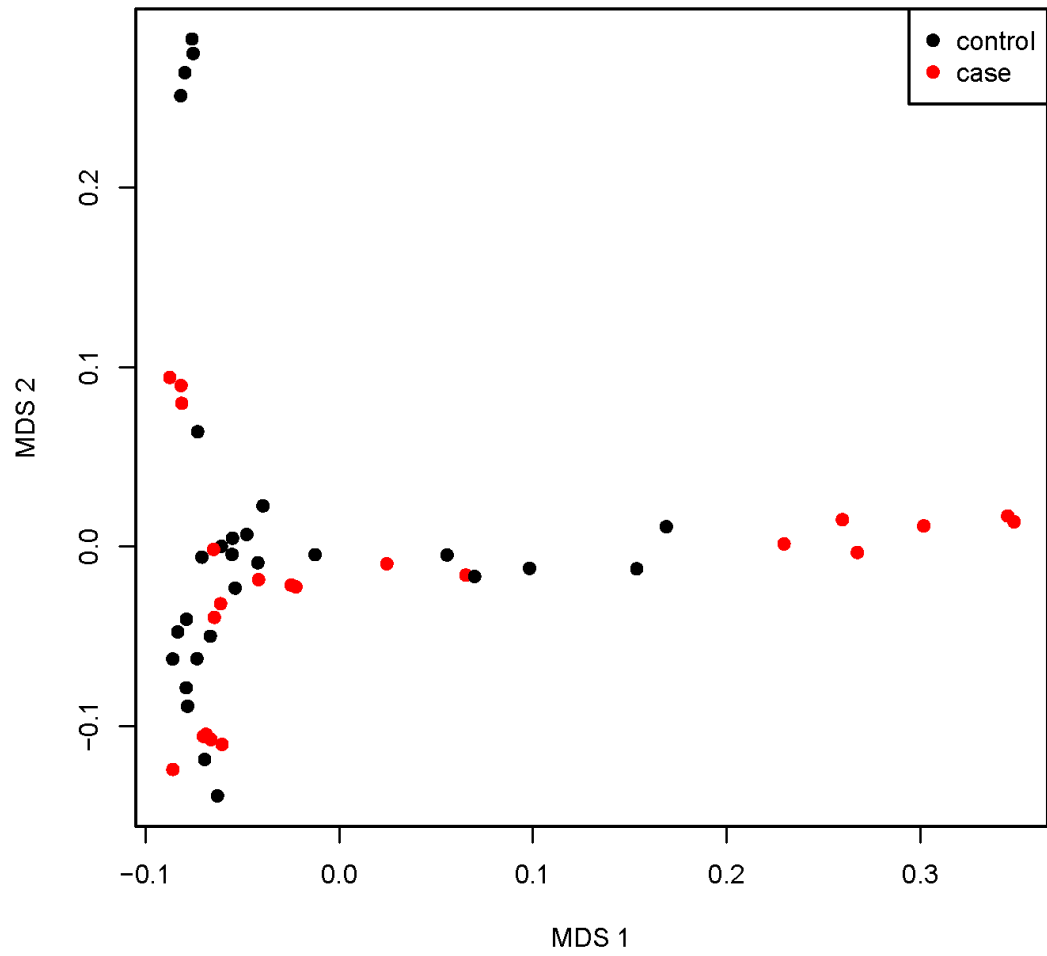

**Supplementary Figure S1.** Multidimensional scaling plot (MDS plot). The black dots represent animals in the control group, and the red dots indicate animals from the case group.

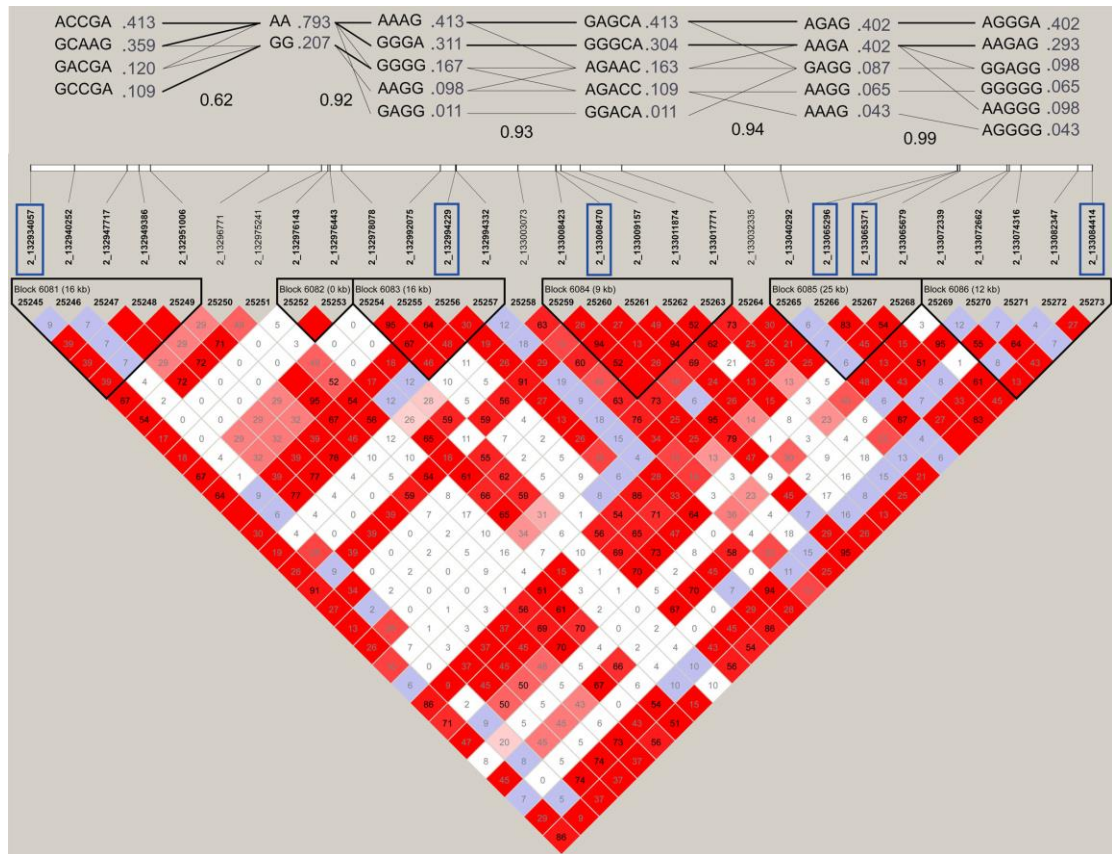

**Supplementary Figure S2.** The significantly associated haplotypes and LD blocks visualised using Haploview v4.2. The blocks were defined by four-gamete rule.  $r^2$  values are presented in colourful squares. Haplotypes with population frequencies are upside of each block. In the crossing areas, multiallelic  $D'$  values indicate the level of recombination between the two blocks. SNPs (denoted by position on chromosome 2) in blue boxes from left to right are the significant SNPs (rs429526398, rs419153948, rs428938943, rs422753866, rs403336550 and rs428812278, see also Table 1) detected by genome-wide association (GWA) analysis.

**Supplementary Table S1.** Functional genes in the candidate genomic region (132.0

-133.1 Mb) on chromosome 2

| <b>Gene</b>         | <b>Start (bp)</b> | <b>Stop (bp)</b> | <b>Strand</b> | <b>Description</b>           |
|---------------------|-------------------|------------------|---------------|------------------------------|
| <i>LOC105609044</i> | 132190083         | 132197376        | +             | uncharacterized LOC105609044 |
| <i>LOC105609042</i> | 132210048         | 132363017        | -             | uncharacterized LOC105609042 |
| <i>LOC106990953</i> | 132345268         | 132350981        | +             | uncharacterized LOC106990953 |
| <i>LOC105609047</i> | 132434763         | 132443283        | +             | uncharacterized LOC105609047 |
| <i>MTX2</i>         | 132672354         | 132748945        | -             | metaxin 2                    |
| <i>HOXD1</i>        | 132830789         | 132832890        | -             | homeobox D1                  |
| <i>LOC105609052</i> | 132842815         | 132843657        | +             | uncharacterized LOC105609052 |
| <i>LOC105609054</i> | 132845690         | 132847753        | -             | uncharacterized LOC105609054 |
| <i>HOXD3</i>        | 132847778         | 132866477        | -             | homeobox D3                  |
| <i>MIR10B</i>       | 132868982         | 132869080        | -             | microRNA mir-10b             |
| <i>LOC105610367</i> | 132876480         | 132884305        | +             | myosin heavy chain IB-like   |
| <i>HOXD8</i>        | 132884968         | 132888875        | -             | homeobox D8                  |
| <i>HOXD9</i>        | 132894431         | 132899468        | -             | homeobox D9                  |
| <i>HOXD10</i>       | 132899503         | 132902661        | -             | homeobox D10                 |
| <i>LOC101104380</i> | 132909273         | 132915738        | -             | homeobox protein Hox-D11     |
| <i>HOXD12</i>       | 132916631         | 132919361        | -             | homeobox D12                 |
| <i>HOXD13</i>       | 132922784         | 132926088        | -             | homeobox D13                 |
| <i>EVX2</i>         | 132934176         | 132938463        | +             | even-skipped homeobox 2      |
| <i>LOC101107331</i> | 132987715         | 132988173        | -             | uncharacterized LOC101107331 |
| <i>KIAA1715</i>     | 133011855         | 133110982        | +             | KIAA1715 orthology           |
